# Supplementary material
Source: publisher figshare collection journal article supplement (https://karger.figshare.com/ndownloader/files/22233522)
Supplement: Supplementary file 1 [file 22233522]

Table S2. Bias in selection of participants into the study assessment tool (ROBINS-I) [92]

| **Criteria** | | |
| --- | --- | --- |
|  | 1. Was selection of participants into the study (or into the analysis) based on participant characteristics observed after the start of intervention?  If N/PN to 2.1: go to 2.4 | Y / PY / PN / N / NI |
| 1.1. If Y/PY to 2.1: Were the post-intervention variables that influenced selection likely to be associated with intervention?  1.2 If Y/PY to 2.2: Were the post-intervention variables that influenced selection likely to be influenced by the outcome or a cause of the outcome? | NA / Y / PY / PN / N / NI  NA / Y / PY / PN / N / NI |
| 2. Do start of follow-up and start of intervention coincide for most participants? | Y / PY / PN / N / NI |
| 3. If Y/PY to 2.2 and 2.3, or N/PN to 2.4: Were adjustment techniques used that are likely to correct for the presence of selection biases? | NA / Y / PY / PN / N / NI |
| 4. Risk of bias judgement | Low / Moderate / Serious / Critical / NI |
